# Supplementary material
Source: PubMed Central journal article supplement (PMC2722280)
Supplement: 0902578106_0902578106SI.pdf [file 0902578106_0902578106SI.pdf]

# Supporting Information

Hirakawa et al. 10.1073/pnas.0902578106

## SI Methods

**Immunoelectron Microscopy.** Twenty-four hours after bombardment, the transient transformed cells were fixed for 2 h at 4 °C in 3% paraformaldehyde/0.5% glutaraldehyde/0.25 M sucrose in PHEM buffer (60 mM Pipes/25 mM Hepes/10 mM EGTA/2 mM MgCl<sub>2</sub>, pH 7.4). An isolated transformant with GFP fluorescent was transferred onto a poly-L-lysine coated coverslip (18 × 18 mm) using micropipetting; it was then dehydrated for 5 min in each increment of the graded ethanol series (20, 40, 60, 80, and 100%), followed by infiltration with LR White:ethanol gradients of 1:2 for 1 h, 1:1 for 1 h, 2:1 for 1 h, and 100% for 12 h. All dehydration and infiltration steps were performed at 4 °C. The coverslip was placed on gelatin capsules filled with LR White, and it was polymerized at 58 °C for 24 h. The polymerized block was removed from the coverslip and sectioned on a Reichert

Ultracut S ultramicrotome (Leica), using a diamond knife. Gold sections were collected onto Formvar-coated copper mesh or 1-slot grids. Before immunogold-labeling, the sections on grids were blocked with blocking solution (5% normal goat serum/2.5% skim milk/0.1% NaN<sub>3</sub> in PBS) for 1 h at room temperature. The grids were then incubated in 25 μL anti-GFP primary antibody (Clontech; Living Colors A.v. Monoclonal Antibody JL-8 no. 8371), diluted 1:25 with PBS, for 2 h at 30 °C. The grids were washed with PSB supplemented 0.05% Tween-20 for 5 min and 20 times on drops of PBS. The rinsed grids were then incubated on 30 μL anti-mouse IgG secondary antibody (Sigma) conjugated with 10 nm gold particles (diluted 1:20 with PBS) for 1 h at 30 °C. The labeled grids were rinsed with PBS and Milli-Q water, followed by staining with uranyl acetate for 10 min; the ultrathin sections were then observed under a JEM-1010 transmission electron microscope (JEOL) at 80 kV.

|         | Signal peptide (SP)                  |            |            |            |            |            |       |       |       |       |
|---------|--------------------------------------|------------|------------|------------|------------|------------|-------|-------|-------|-------|
| BnAtpD  | MARKIVASLA                           | LNAFLALALV | AFIACRSTNG | -----      | -----      | -----      | ----- | ----- | ----- | ----- |
| BnFdx1  | MHSEYENFGE                           | PKTNYTKLIA | SVALNVVLFV | GIVCVLSSGS | A-----     | -----      | ----- | ----- | ----- | ----- |
| BnRpL28 | MMGRSSSFAM                           | KSSLLLNALL | ALIALG---- | -----      | -----      | -----      | ----- | ----- | ----- | ----- |
|         | ▼ predicted cleavage site            |            |            |            |            |            |       |       |       |       |
|         | Transit peptide-like sequence (TPL)  |            |            |            |            |            |       |       |       |       |
| BnAtpD  | HVGSIVRTP                            | TSTFSMPSIR | TPMMGRNLR- | -----      | -----      | -----      | ----- | ----- | ----- | ----- |
| BnFdx1  | DQQLGAGLAM                           | RAPAVGARVL | RTPGNQCLRV | SGKNPFSRVA | VSAIHAPMTA | -----      | ----- | ----- | ----- | ----- |
| BnRpL28 | ALVSFRTSTT                           | GGENLEAVMS | TISRNVAVNG | RRNQIASGRR | CGLTGKSGTT | AYKYCFSHKR | ----- | ----- | ----- | ----- |
|         | ▼ predicted cleavage site            |            |            |            |            |            |       |       |       |       |
|         | Mature protein (MP)                  |            |            |            |            |            |       |       |       |       |
| BnAtpD  | ANAGKMREAV                           | ADEYGTGLAQ | MAKEEKIVDK | VQNDLNVWVD | VFKTEPQVRD | FMYDPLSNVE | ----- | ----- | ----- | ----- |
| BnFdx1  | AATYKVTLQT                           | PEGESVIECP | DDTYVLDKAE | EEGLDLPYSC | RAGACSTCAG | KVVAGSVDQS | ----- | ----- | ----- | ----- |
| BnRpL28 | ATKRQHPNIQ                           | QKYVFWPEGQ | RMVKIKLSTS | ALKSIDKKGL | QVMAKEAGID | LNKLPFKDMR | ----- | ----- | ----- | ----- |
|         | Mature protein (MP)                  |            |            |            |            |            |       |       |       |       |
| BnAtpD  | EKKGLVNDVV                           | KKAGMQGYTS | NFLNLLDMG  | RFDQLEEIAQ | VFEEVMMKMQ | DTKAVTVRTA | ----- | ----- | ----- | ----- |
| BnFdx1  | DQSFLSDSQV                           | ADGFVLTCVA | YPTSDVTIAT | HQEEELF*   | -----      | -----      | ----- | ----- | ----- | ----- |
| BnRpL28 | PERQEYKEKH                           | KMEVPVSKKW | VSGYYKKQHR | MKNAEKLAAS | KKTPLEGKYY | HGRVLFGRFN | ----- | ----- | ----- | ----- |
|         | Mature protein (MP)                  |            |            |            |            |            |       |       |       |       |
| BnAtpD  | VDLDDAMFK                            | IAEKVKQISG | AQNIQMKQEV | DDSLLAGFVI | DMEGQQIDLS | LKNELDTLRS | ----- | ----- | ----- | ----- |
| BnFdx1  | -----                                | -----      | -----      | -----      | -----      | -----      | ----- | ----- | ----- | ----- |
| BnRpL28 | EDQMRQINDVPLEDTAEKVYEEGLEVEDTSAPASA* | -----      | -----      | -----      | -----      | -----      | ----- | ----- | ----- | ----- |
|         | Mature protein (MP)                  |            |            |            |            |            |       |       |       |       |
| BnAtpD  | EMMRPQAA*                            | -----      | -----      | -----      | -----      | -----      | ----- | ----- | ----- | ----- |
| BnFdx1  | -----                                | -----      | -----      | -----      | -----      | -----      | ----- | ----- | ----- | ----- |
| BnRpL28 | -----                                | -----      | -----      | -----      | -----      | -----      | ----- | ----- | ----- | ----- |

**Fig. S1.** An alignment of 3 plastid preprotein sequences (BnAtpD, BnFdx1, and BnRpL28) identified from a chlorarachniophyte *Bigelowiella natans*. These 3 preproteins have an N-terminal extension, which is predicted to be a bipartite targeting signal containing a signal peptide (SP) and a transit peptide-like sequence (TPL). The red arrowhead indicates the putative cleavage sites of the SPs, and the blue arrowhead indicates the putative TPL cleavage sites. The SP and TPL cleavage sites were predicted by the signal peptide prediction server SignalP ([www.cbs.dtu.dk/services/SignalP](http://www.cbs.dtu.dk/services/SignalP)) and the chloroplast TP prediction server ChloroP ([www.cbs.dtu.dk/services/ChloroP](http://www.cbs.dtu.dk/services/ChloroP)), respectively.



>ATP synthase delta subunit  
 HVGSAIVRTPTSTFSMPSIRTPMMGRNLR-ANAGK

>ATP synthase gamma subunit  
 LGVTRSAAFSPAGTTRDVSNIRANANLKEVRGRIESVSNTKKITSSMKLVAAAKVRKAQAAVLGGRPFAENLVKTLYGINQKVR-AEALT

>ferredoxin 1  
 DQQLGAGLAMRAPAVGARVLRTPGNQCLRVSGKNPFSRVAVSAIHAPMTA-AATYK

>photosystem II protein PsbO  
 AVYMSSGAQELSMVAPRQTRVFASKPNAMKNIAAGLA-AAGVS

>ribosomal protein rpL3  
 SIILSGLSPNLSSPM-AAAAAR

>ribosomal protein rpL9  
 QQIGLPATKYNARVTSPVWRITPSRRCTSMSARRKKMVDVLLKEDVK-GSGKK

>Fe-S subunit of cytochrome c6f complex  
 VNRTQEGSLQLSAVRGKIAAPRTSFQNAVSRVSRNQLPSSSRKAVAQAFLSNPDMVPMGKRKLMNNLVLAAPVV-ASAGG

>geranyl-geranyl reductase  
 ANPLGTAIVPSSASRSMYRAGPSTSSIPRGASGISSSSMGAMGAINNHNLKMPKGTKFHCNWWAGERNLKGHAK-ADGSK

>phosphoglycerate kinase 1  
 NQQVAVEPLVGGGFSMAGVRPVSMAVAPMHSVSPMNVGRFSKPSVTKFSAVSRPQQLKVN-VEKKM

>coproporphyrinogen III oxidase  
 TRGHFQVARSAPARSANTRITAAASRMQTAGKLFGGFSSATNKRDIGVRVIS-AESPT

>ribosomal protein rpS10  
 CFRGFSTPNNLERVLVQRISGNAPTGLTTINRMSRKLPTLVRSSNQPFVSGSTV-AEMAS

>photosystem II protein PsbW  
 SNLGATAIRSRVSPVSSVR-AGRMA

**Fig. S3.** TPL sequences of 12 plastid-targeted preproteins of a chlorarachniophyte, *B. natans*. These preproteins have consensus sequences that are similar to the C-terminal functional domain sequence, L-R-A-N-A, of BnAtpD TPL in chemical nature. The consensus sequences (I/L/M/V)-X-(A/G)-X-(A/G), indicated by red characters, are generally located near the putative TPL cleavage sites (-).
